# Supplementary material
Source: PubMed Central journal article supplement (PMC7331146)
Supplement: 12879_2020_5167_MOESM10_ESM.pdf [file 12879_2020_5167_MOESM10_ESM.pdf]

**Supplemental Table 7. Factors associated with ICU admission, mechanical ventilation, and death during hospitalization in influenza-positive patients**

| Factor                                                 | Age group | OR (95% CI)               |                            |                              |
|--------------------------------------------------------|-----------|---------------------------|----------------------------|------------------------------|
|                                                        |           | ICU admission             | Mechanical ventilation     | Death during hospitalization |
| COPD                                                   | 15 to <50 | 0.69 (0.10, 4.87)         | 1.47 (0.12, 18.81)         | -                            |
|                                                        | 50 to <65 | <b>2.88 (1.21, 6.84)</b>  | 2.17 (0.91, 5.19)          | 0.60 (0.15, 2.40)            |
|                                                        | ≥65       | <b>2.84 (1.44, 5.57)</b>  | <b>2.33 (1.33, 4.07)</b>   | 0.89 (0.49, 1.62)            |
| Cardiovascular disease                                 | 15 to <50 | <b>4.11 (1.29, 13.13)</b> | 0.74 (0.12, 4.68)          | -                            |
|                                                        | 50 to <65 | 1.73 (0.78, 3.84)         | 1.08 (0.46, 2.56)          | 0.54 (0.17, 1.71)            |
|                                                        | ≥65       | 1.00 (0.50, 2.01)         | 1.02 (0.57, 1.81)          | <b>1.88 (1.01, 3.50)</b>     |
| Diabetes                                               | 15 to <50 | 2.87 (0.85, 9.65)         | 2.28 (0.50, 10.43)         | -                            |
|                                                        | 50 to <65 | 1.59 (0.60, 4.23)         | 2.67 (0.97, 7.39)          | 0.95 (0.22, 4.19)            |
|                                                        | ≥65       | 1.08 (0.50, 2.32)         | 1.28 (0.71, 2.33)          | 0.96 (0.53, 1.73)            |
| Obesity                                                | 15 to <50 | 2.18 (0.75, 6.36)         | 3.69 (1.00, 13.63)         | -                            |
|                                                        | 50 to <65 | 0.92 (0.34, 2.50)         | 0.62 (0.20, 1.91)          | 1.91 (0.22, 4.19)            |
|                                                        | ≥65       | 1.90 (0.75, 4.82)         | <b>2.64 (1.36, 5.13)</b>   | 1.15 (0.58, 2.30)            |
| Other chronic conditions                               | 15 to <50 | 1.26 (0.50, 3.21)         | 2.29 (0.78, 6.69)          | -                            |
|                                                        | 50 to <65 | 0.52 (0.21, 1.29)         | 0.55 (0.20, 1.48)          | 1.46 (0.45, 4.72)            |
|                                                        | ≥65       | 0.71 (0.33, 1.52)         | 0.66 (0.35, 1.25)          | 1.52 (0.84, 2.76)            |
| Male                                                   | <15       | 1.20 (0.64, 2.26)         | 1.49 (0.26, 8.63)          | 1.20 (0.29, 5.07)            |
|                                                        | 15 to <50 | 1.21 (0.50, 2.91)         | 1.30 (0.47, 3.57)          | -                            |
|                                                        | 50 to <65 | 2.20 (0.97, 4.96)         | <b>3.11 (1.28, 7.59)</b>   | <b>8.34 (2.08, 33.47)</b>    |
|                                                        | ≥65       | 0.83 (0.42, 1.64)         | 0.65 (0.37, 1.14)          | 1.18 (0.67, 2.08)            |
| Current smoker                                         | 15 to <50 | 1.76 (0.71, 4.38)         | 0.53 (0.14, 1.94)          | -                            |
|                                                        | 50 to <65 | 1.20 (0.53, 2.73)         | 0.79 (0.34, 1.85)          | 0.38 (0.10, 1.39)            |
|                                                        | ≥65       | 3.26 (1.44, 7.35)         | 2.09 (1.00, 4.39)          | 0.93 (0.37, 2.33)            |
| Influenza B (vs. A)                                    | <15       | 0.94 (0.44, 1.99)         | <b>13.44 (1.32, 136.8)</b> | 3.32 (0.69, 16.04)           |
|                                                        | 15 to <50 | 0.67 (0.23, 1.92)         | 0.28 (0.07, 1.22)          | -                            |
|                                                        | 50 to <65 | 0.55 (0.20, 1.49)         | 0.71 (0.26, 1.99)          | 0.44 (0.11, 1.75)            |
|                                                        | ≥65       | 0.93 (0.40, 2.13)         | 1.01 (0.52, 1.95)          | 0.56 (0.29, 1.08)            |
| Use of antivirals during the current influenza episode | <15       | 0.98 (0.21, 4.53)         | None observed              | None observed                |
|                                                        | 15 to <50 | <b>3.86 (1.37, 10.82)</b> | <b>3.87 (1.13, 13.28)</b>  | -                            |
|                                                        | 50 to <65 | <b>4.80 (1.53, 15.08)</b> | 1.20 (0.36, 4.01)          | 0.99 (0.22, 4.38)            |
|                                                        | ≥65       | 1.74 (0.60, 5.02)         | 1.11 (0.53, 2.34)          | 0.76 (0.39, 1.47)            |
| Hospitalization during the last 12 months              | <15       | 0.90 (0.42, 1.93)         | 3.78 (0.71, 20.21)         | 1.20 (0.26, 5.53)            |
|                                                        | 15 to <50 | 0.86 (0.33, 2.25)         | 0.40 (0.11, 1.41)          | -                            |
|                                                        | 50 to <65 | <b>2.97 (1.28, 6.91)</b>  | 1.86 (0.78, 4.42)          | 2.86 (0.89, 9.22)            |
|                                                        | ≥65       | 0.58 (0.28, 1.21)         | 0.84 (0.47, 1.51)          | 1.46 (0.83, 2.56)            |
| Any chronic condition                                  | <15       | 2.24 (0.88, 5.76)         | 0.94 (0.07, 11.95)         | 0.88 (0.06, 13.44)           |

Abbreviations: ICU, intensive care unit; OR, odds ratio

Adjusted ORs were determined by mixed effects logistic regression adjusted for age and vaccination for influenza during the previous 12 months and with site as a random effect. For patients aged 15 to <65 years (N=1,193) and ≥65 years (N=776), covariates included cardiovascular disease, COPD, diabetes, obesity, other chronic conditions, sex, current smoking, influenza B, antiviral use during the current influenza episode, hospitalization during the previous 12 months, site (as random effect), vaccination, and age. For patients aged <15 years (N=1,309), covariates included any chronic condition, sex, age, influenza B, antiviral use during the current influenza episode, hospitalization during the previous 12 months, site (as random effect), vaccination, and age. Factors associated with ICU admission, mechanical ventilation, or death during hospitalization are indicated in bold text.
